# Supplementary material
Source: PubMed Central journal article supplement (PMC5774642)
Supplement: NIHMS913214-supplement-1.pdf [file NIHMS913214-supplement-1.pdf]

## **SUPPLEMENTAL APPENDIX**

### **Table of Contents**

1. Supplemental Tables
2. Supplemental Figures

**Supplemental Table 1. Baseline Characteristics of Patients Treated with anti-CD22 CAR T cells**

| Pt # | Demographics |     | Prior Therapy |                             |                       |               |                       | Status                                  |                                |                                                              |                       |                                       |
|------|--------------|-----|---------------|-----------------------------|-----------------------|---------------|-----------------------|-----------------------------------------|--------------------------------|--------------------------------------------------------------|-----------------------|---------------------------------------|
|      | Age (yrs)    | Sex | HSCT          | CD19 Immunotherapy          |                       | CD22 Antibody |                       | Circulating B cells/mcL (non-malignant) | Marrow Blasts (%) <sup>*</sup> | Extramedullary disease                                       | Blast CD19 Expression | Blast CD22 Site Density (number/cell) |
|      |              |     |               | Agent                       | Response <sup>‡</sup> | Agent         | Response <sup>‡</sup> |                                         |                                |                                                              |                       |                                       |
| 1    | 22           | M   | Y             | CD19.BB.z-CAR               | CR                    | Ino           | SD                    | 5                                       | 99.0**                         | ---                                                          | Neg                   | 2,084                                 |
| 2    | 20           | F   | Y (2)         | CD19.28.z-CAR               | CR                    | ---           | ---                   | 623                                     | 5.0 <sup>^</sup>               | ---                                                          | Dim                   | 13,452                                |
| 3    | 22           | M   | Y             | CD19.BB.z-CAR               | CR                    | ---           | ---                   | 2                                       | 97.0                           | ---                                                          | Neg                   | 846                                   |
| 4    | 22           | M   | Y             | CD19.28.z-CAR               | PD                    | ---           | ---                   | 3                                       | 99.0                           | ---                                                          | Pos                   | 1,867                                 |
| 5    | 7            | F   | Y             | CD19.BB.z-CAR               | CR                    | ---           | ---                   | 0                                       | 78.0                           | ---                                                          | Neg                   | 2,839                                 |
| 6    | 17           | F   | Y             | CD19.BB.z-CAR               | CR                    | ---           | ---                   | 0                                       | 2.6                            | ---                                                          | Neg                   | 4,988                                 |
| 7    | 17           | M   | Y (2)         | ---                         | ---                   | ---           | ---                   | 121                                     | 2.6                            | ---                                                          | Pos                   | 8,514                                 |
| 8    | 19           | F   | Y             | ---                         | ---                   | ---           | ---                   | 9                                       | 0.3                            | ---                                                          | Pos                   | 10,432                                |
| 9    | 21           | F   | Y             | CD19.BB.z-CAR               | CR                    | ---           | ---                   | 0                                       | 91.0                           | ---                                                          | Neg                   | 1,866                                 |
| 10   | 26           | M   | Y             | Blinatumomab                | PD                    | ---           | ---                   | 48                                      | >99.0                          | ---                                                          | Pos                   | 8,430                                 |
| 11   | 7            | M   | Y             | CD19.28.z-CAR <sup>@^</sup> | PD                    | Ino           | CR                    | 391                                     | 19.0                           | ---                                                          | Pos                   | 4,816                                 |
| 12   | 15           | M   | Y             | CD19.28.z-CAR               | CR                    | Ino           | CR                    | 17                                      | 0.05                           | Renal mass, Vertebral body masses                            | Pos                   | 922                                   |
| 13   | 30           | M   | Y             | CD19.28.z-CAR               | CR                    | ---           | ---                   | 0                                       | 27.0                           | Renal mass, Vertebral body masses, abdominal lymphadenopathy | Neg                   | 3,575                                 |
| 14   | 18           | F   | Y             | ---                         | ---                   | ---           | ---                   | 488                                     | 30.0                           | ---                                                          | Pos                   | 7,722                                 |
| 15   | 8            | F   | Y             | CD19.BB.z-CAR               | CR                    | Ino           | CR                    | 0                                       | 94.0                           | Temporal mass                                                | Neg                   | 909                                   |
| 16   | 26           | M   | Y             | Blinatumomab                | CR                    | ---           | ---                   | 131                                     | 77.0                           | ---                                                          | Neg                   | 4,568                                 |
| 17   | 27           | M   | Y             | CD19.28.z-CAR <sup>@</sup>  | CR                    | Ino           | CR                    | 1                                       | 17.0                           | Pleural Effusion                                             | Pos                   | 613 <sup>#</sup>                      |
| 18   | 12           | M   | N             | ---                         | ---                   | ---           | ---                   | 26                                      | 75.0                           | ---                                                          | Pos                   | 2,267                                 |
| 19   | 19           | M   | Y             | CD19.BB.z-CAR               | CR                    | ---           | ---                   | 0                                       | 87.0                           | ---                                                          | Neg                   | 2,196                                 |
| 20   | 8            | F   | Y             | CD19.BB.z-CAR               | CR                    | ---           | ---                   | 455                                     | 70.5                           | ---                                                          | Pos                   | 5,779                                 |
| 21   | 12           | M   | N             | CD19.28.z-CAR               | CR                    | ---           | ---                   | 111                                     | 2.6                            | ---                                                          | Pos                   | 9,197                                 |

M=male; F=female; HSCT=allogeneic hematopoietic stem cell transplantation; Y=yes; N=no; CR=complete remission; PD=progressive disease; Ino=Inotuzumab; <sup>‡</sup> all CRs were MRD negative \*% blasts of mononuclear cells by flow cytometry, except when indicated otherwise. \*\* marrow biopsy, as patient was unascrable. <sup>^</sup>% blasts in peripheral blood that developed following enrollment marrow, prior to therapy. <sup>#</sup>Partial CD22 expression at baseline (post-CD22 targeted antibody therapy). <sup>@</sup>Also received prior blinatumomab. <sup>^</sup>Non-responder to CD19 CAR and blinatumomab.

**Supplemental Table 2. Characteristics of Infused anti-CD22 CAR-T Cell Product**

| Pt. # | Cell Dose (10 <sup>6</sup> /kg) | % Transduced (Protein L) | %CD3  | % CD4 | %CD8  | Cryopreserved Prior to Infusion? |
|-------|---------------------------------|--------------------------|-------|-------|-------|----------------------------------|
| 1     | 0.3                             | 50.2%                    | 98.8% | 13.4% | 84.9% | N                                |
| 2     | 0.3                             | 50.1%                    | 99.9% | 63.6% | 35.4% | Y                                |
| 3     | 0.3                             | 41.2%                    | 98.1% | 33.1% | 63.8% | N                                |
| 4     | 0.3                             | 45.0%                    | 99.6% | 94.3% | 5.0%  | Y                                |
| 5     | 0.3                             | 31.7%                    | 99.8% | 42.8% | 56.9% | Y                                |
| 6     | 0.3                             | 34.7%                    | 99.3% | 36.3% | 44.0% | Y                                |
| 7     | 1                               | 47.8%                    | 99.8% | 70.9% | 26.8% | N                                |
| 8     | 1                               | 23.4%                    | 99.2% | 25.8% | 72.7% | Y                                |
| 9     | 1                               | 36.9%                    | 99.8% | 67.6% | 30.8% | Y                                |
| 10    | 3                               | 33.4%                    | 96.8% | 67%   | 28.6% | Y                                |
| 11    | 3                               | 18.8%                    | 99.9% | 78.6% | 17.2% | N                                |
| 12    | 1                               | 28.8%                    | 99.8% | 49%   | 50.0% | N                                |
| 13    | 1                               | 18%                      | 99.6% | 75.55 | 23.6% | N                                |
| 14    | 1                               | 40.7%                    | 99.8% | 76.8% | 22.3% | N                                |
| 15    | 1                               | 15.4%                    | 99.5% | 60.5% | 38%   | N                                |
| 16    | 1                               | 23.1%                    | 99.6% | 51.1% | 48.1% | Y                                |
| 17    | 1                               | 28.5%                    | 99.7% | 56.9% | 41.8% | N                                |
| 18    | 1                               | 39.1%                    | 99.9% | 69.4% | 29.3% | Y                                |
| 19    | 1                               | 29.2%                    | 99.9% | 46.3% | 51%   | N                                |
| 20    | 1                               | 48.7%                    | 99.8% | 59.8% | 38.1% | N                                |
| 21    | 1                               | 33.4%                    | 99.7% | 32.5% | 66.1% | N                                |

**Supplemental Table 3. Grade 3 and 4 Adverse Events at Least Possibly Related to CD22 CAR T cells from Time of Infusion through Day 28**

|                                                             | Dose 1 |   | Dose 2 |    | Dose 3 |   |
|-------------------------------------------------------------|--------|---|--------|----|--------|---|
|                                                             | 3      | 4 | 3      | 4  | 3      | 4 |
| <b>Blood &amp; Lymphatic System Disorders</b>               |        |   |        |    |        |   |
| Anemia                                                      | 10     |   | 25     |    | 1      |   |
| Febrile neutropenia                                         | 6      |   | 14     |    | 2      |   |
| <b>Cardiac Disorders</b>                                    |        |   |        |    |        |   |
| Sinus tachycardia                                           |        |   | 1      |    |        |   |
| <b>Gastrointestinal Disorders</b>                           |        |   |        |    |        |   |
| Diarrhea                                                    | 1      |   | 1      |    |        |   |
| <b>General disorders and administration site conditions</b> |        |   |        |    |        |   |
| Fever                                                       | 2      | 1 | 11     |    | 2      |   |
| Multi-organ failure                                         |        |   |        | 1  |        |   |
| <b>Infections and Infestations</b>                          |        |   |        |    |        |   |
| Catheter related infections                                 |        |   |        | 1  |        |   |
| Sepsis                                                      |        |   |        | 1  |        |   |
| <b>Investigations</b>                                       |        |   |        |    |        |   |
| Activated partial thromboplastin time prolonged             |        |   | 3      |    |        |   |
| Alanine aminotransferase increased                          |        |   | 1      |    |        |   |
| Alkaline phosphatase increased                              |        |   | 2      |    |        |   |
| Aspartate aminotransferase increased                        | 1      |   | 6      | 1  | 1      |   |
| Blood bilirubin increased                                   |        |   | 2      |    |        |   |
| CPK increased                                               |        |   | 1      |    |        |   |
| Fibrinogen decreased                                        |        |   | 4      |    |        |   |
| GGT increased                                               |        |   |        | 1  |        |   |
| INR increased                                               |        |   | 1      |    |        |   |
| Lipase increased                                            |        |   | 1      | 1  |        |   |
| Lymphocyte count decreased                                  |        |   | 13     | 7  | 3      | 1 |
| Neutrophil count decreased                                  | 4      | 6 | 15     | 11 | 4      | 2 |
| Platelet count decreased                                    | 3      | 2 | 22     | 17 | 8      | 7 |
| Serum amylase increased                                     |        |   | 1      |    |        |   |
| Urine output decreased                                      |        |   |        | 1  |        |   |
| Weight gain                                                 |        |   | 1      |    |        |   |
| White blood cell decreased                                  | 6      | 2 | 14     | 11 | 6      | 5 |
| <b>Metabolism and nutrition disorders</b>                   |        |   |        |    |        |   |
| Hypertriglyceridemia                                        |        |   | 6      | 2  |        |   |
| Hypokalemia                                                 | 3      |   | 4      |    |        |   |
| Hyponatremia                                                |        |   | 7      |    | 1      |   |
| Hypophosphatemia                                            | 2      | 1 | 26     | 1  | 4      |   |
| Tumor lysis syndrome                                        |        |   | 1      |    |        |   |
| <b>Respiratory, thoracic and mediastinal disorders</b>      |        |   |        |    |        |   |
| Epistaxis                                                   |        |   | 1      |    |        |   |
| Hypoxia                                                     |        |   |        |    | 2      | 1 |
| Respiratory failure                                         |        |   |        | 1  |        |   |
| <b>Vascular disorders</b>                                   |        |   |        |    |        |   |
| Hypotension                                                 | 1      |   | 3      |    | 1      |   |

**Supplemental Table 4. CAR-T Cell Expansion, Leukemia Response and Toxicity**

| CAR T Cell Dose (10 <sup>6</sup> cells/kg) | Pt # | CAR T Cell Expansion       |                                        |                         |                      |                                 | Toxicity  |                      | Response          |                   |
|--------------------------------------------|------|----------------------------|----------------------------------------|-------------------------|----------------------|---------------------------------|-----------|----------------------|-------------------|-------------------|
|                                            |      | Maximum Circulating CAR/μl | Maximum Circulating CAR % <sup>#</sup> | Marrow <sup>§</sup> (%) | CSF <sup>§</sup> (%) | Pleural Fluids <sup>§</sup> (%) | CRS Grade | DLT (Grade)          | Maximum Response  | Response Duration |
| 0.3                                        | 1    | 2                          | 1.1                                    | 0                       | n/a                  | ---                             | None      | No                   | PD                | n/a               |
|                                            | 2    | 316                        | 52.3                                   | 19.5 <sup>&amp;</sup>   | 0.0                  | ---                             | 1         | Yes (3)              | CR <sup>‡</sup>   | 3 mos             |
|                                            | 3    | 44                         | 73.0                                   | 36.0                    | 32.0                 | ---                             | 1         | No                   | SD                | n/a               |
|                                            | 4    | 1                          | 6.0                                    | 0                       | 0.0                  | ---                             | 2         | No                   | SD                | n/a               |
|                                            | 5    | 0                          | 0.0                                    | 1.3                     | 0.0                  | ---                             | None      | No                   | PD                | n/a               |
|                                            | 6    | 9                          | 1.8                                    | 2.0                     | 0.0                  | ---                             | None      | No                   | PD                | n/a               |
| 1                                          | 7    | 424                        | 62.0                                   | 24.0                    | 52.0                 | ---                             | 2         | No                   | CR <sup>‡</sup> + | 21 mos+           |
|                                            | 8    | 481                        | 36.2                                   | 6.0                     | 26.0                 | ---                             | 1         | No                   | CR <sup>‡</sup>   | 6 mos             |
|                                            | 9    | 1217                       | 75.0                                   | 28.0                    | 6.0*                 | ---                             | 2         | No                   | CR <sup>‡</sup>   | 6 mos             |
| 3                                          | 10   | 15                         | 14.3                                   | 0                       | n/a                  | ---                             | 2         | Yes (4)              | SD                | n/s               |
|                                            | 11   | 732                        | 72                                     | 27.6 <sup>&amp;</sup>   | 21                   | ---                             | 1         | No                   | CR                | 1.5 mos           |
| 1                                          | 12   | 4                          | 2.6                                    | 0                       | 0                    | ---                             | None      | No                   | SD                | n/a               |
|                                            | 13   | 105                        | 60                                     | 42                      | 69                   | ---                             | 1         | No                   | CR <sup>‡**</sup> | 12 mos            |
|                                            | 14   | 150                        | 62                                     | n/a                     | n/a                  | ---                             | 2         | Yes (5) <sup>‡</sup> | CR                | n/a               |
|                                            | 15   | 3593                       | 77                                     | 41                      | 61                   | ---                             | 1         | No                   | CR <sup>‡</sup>   | 2 mos             |
|                                            | 16   | 762                        | 64                                     | 40                      | 27                   | ---                             | 1         | No                   | CR <sup>‡</sup> + | 9 mos+            |
|                                            | 17   | 2167                       | 89.5                                   | 78.2                    | 71.6                 | 73                              | 2         | Yes (4)              | SD                | n/a               |
|                                            | 18   | 0                          | 0                                      | n/a                     | n/a                  | ---                             | None      | No                   | PD                | n/a               |
|                                            | 19   | 2184                       | 91                                     | 71                      | 45                   | ---                             | 2         | No                   | CR                | 6 mos             |
|                                            | 20   | 2831                       | 80                                     | 25                      | 57                   | ---                             | 1         | No                   | CR <sup>‡</sup>   | 6 mos             |
| 21                                         | 324  | 76                         | 31                                     | 41                      | ---                  | 1                               | No        | CR <sup>‡</sup> +    | 6 mos+            |                   |

<sup>#</sup>% of CD3 cells co-expressing CD22-CAR; <sup>§</sup>% of T cells on Day 28±4; <sup>&</sup>BM obtained at 6 weeks; <sup>\*</sup>CSF obtained at 2 mos; CRS=Cytokine Release Syndrome; DLT=dose limiting toxicity; PD=Progressive Disease; CR=complete response; SD=stable disease; PD=progressive disease <sup>‡</sup>MRD negative bone marrow, <sup>\*\*</sup>Attained MRD negative remission in the marrow on Day 28 with decreasing PET-avidity seen in the lymphomatous components of the disease that fully resolved by 5 months post-CAR therapy. <sup>+</sup>Response ongoing, <sup>‡</sup>death due to sepsis

**Supplemental Figure 1: Serum cytokine profiles following CD22 CAR T cells demonstrate multiple distinct patterns.** Serial cytokines were prospectively measured on all patients and representative profiles are shown here. Patients #2, 7, and 9 were all responders and experienced cytokine release syndrome. Of note, patient 7 had low burden leukemia at time of treatment, patient #2 had intermediate leukemic burden and patient #9 had high leukemic burden. Patient #4 had high leukemic burden prior to CD22 CAR treatment, demonstrated cytokine release syndrome with elevations of cytokines as illustrated, and experienced a transient reduction in leukemic blasts following CD22-CAR therapy but did not attain remission.

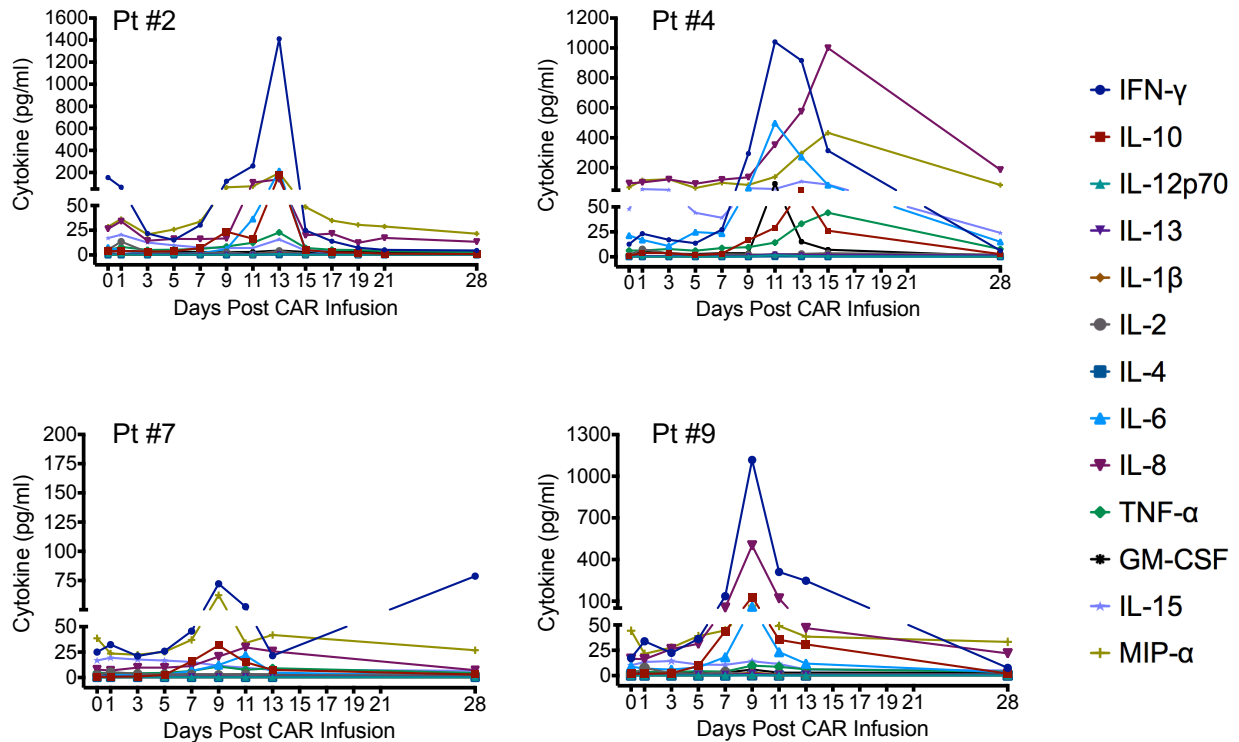

**Supplemental Figure 2: Serum cytokine profiles following CD22 CAR T cells demonstrate multiple distinct patterns.** Patients #8, 11, 13, 14, 15 and 16 all attained complete remission.

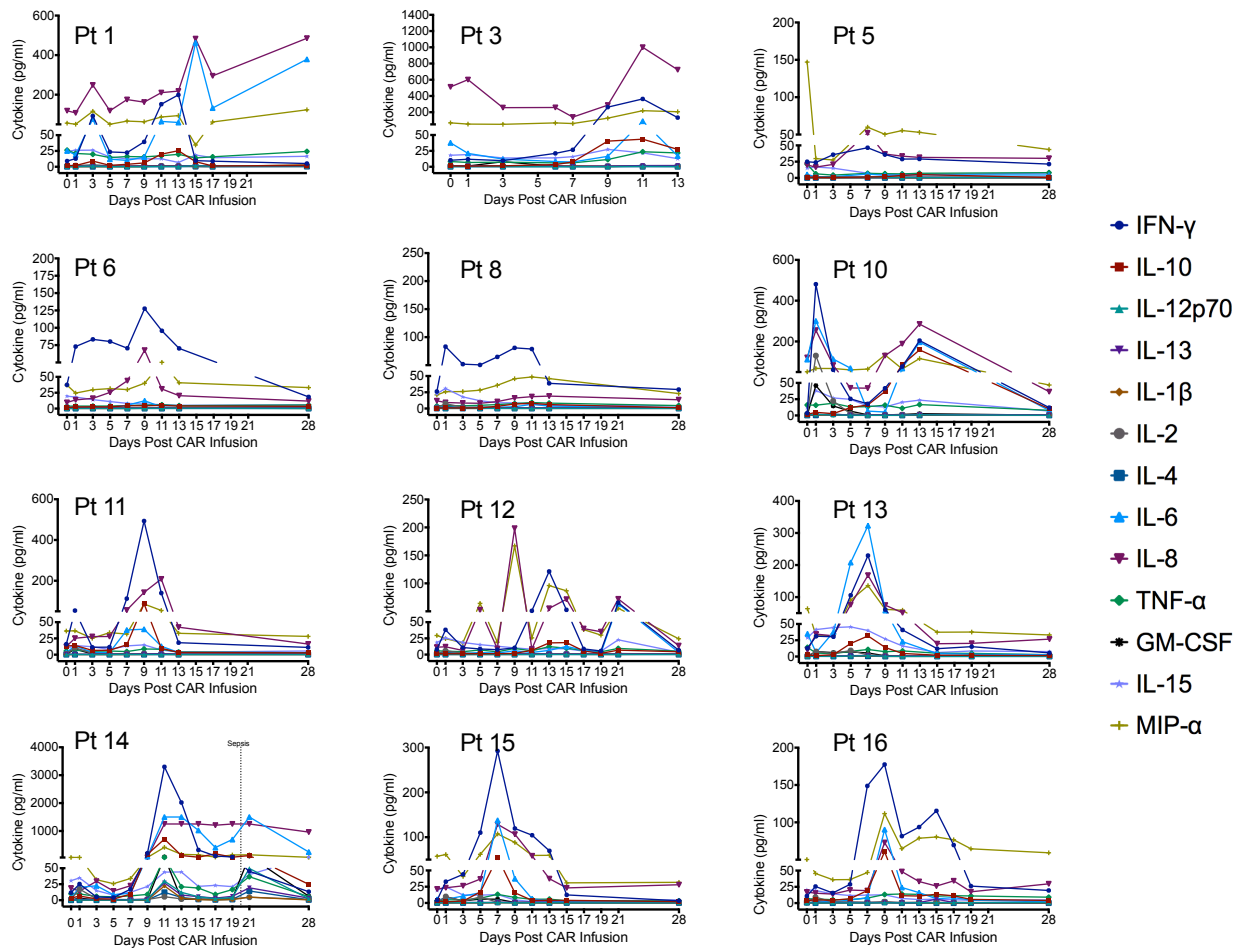

**Supplemental Figure 3: Serial measurements of CD22 site density on leukemic blasts in the presence of CD22 immune pressure demonstrate variability over time.**

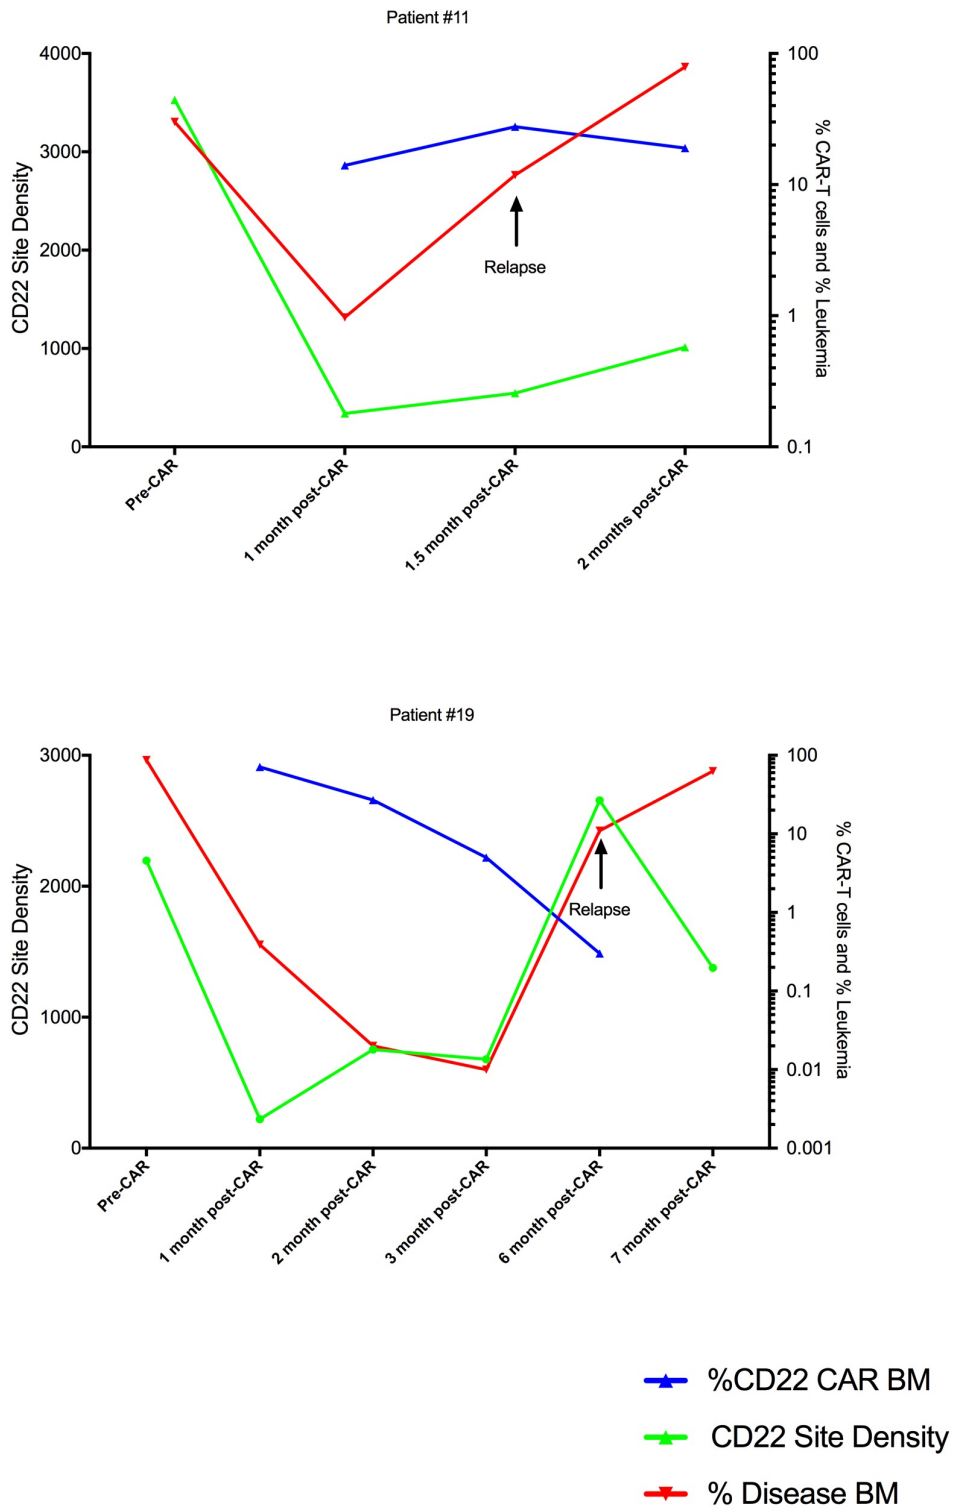



**Supplemental Figure 4. Whole Exome and RNAseq profiling of CD22 in Primary Patient Sample recurring in the presence of CD22 CAR Immune Pressure.** (a) Genome-wide copy number profiling of Patient #3 demonstrates no gains or losses with maintenance of the ploidy status before and after therapy. Neither mutations or focal copy number changes were observed in the CD22 gene locus for patient #3. (b) CD22 transcript levels were noted to slightly increase after CD22 CAR treatment.

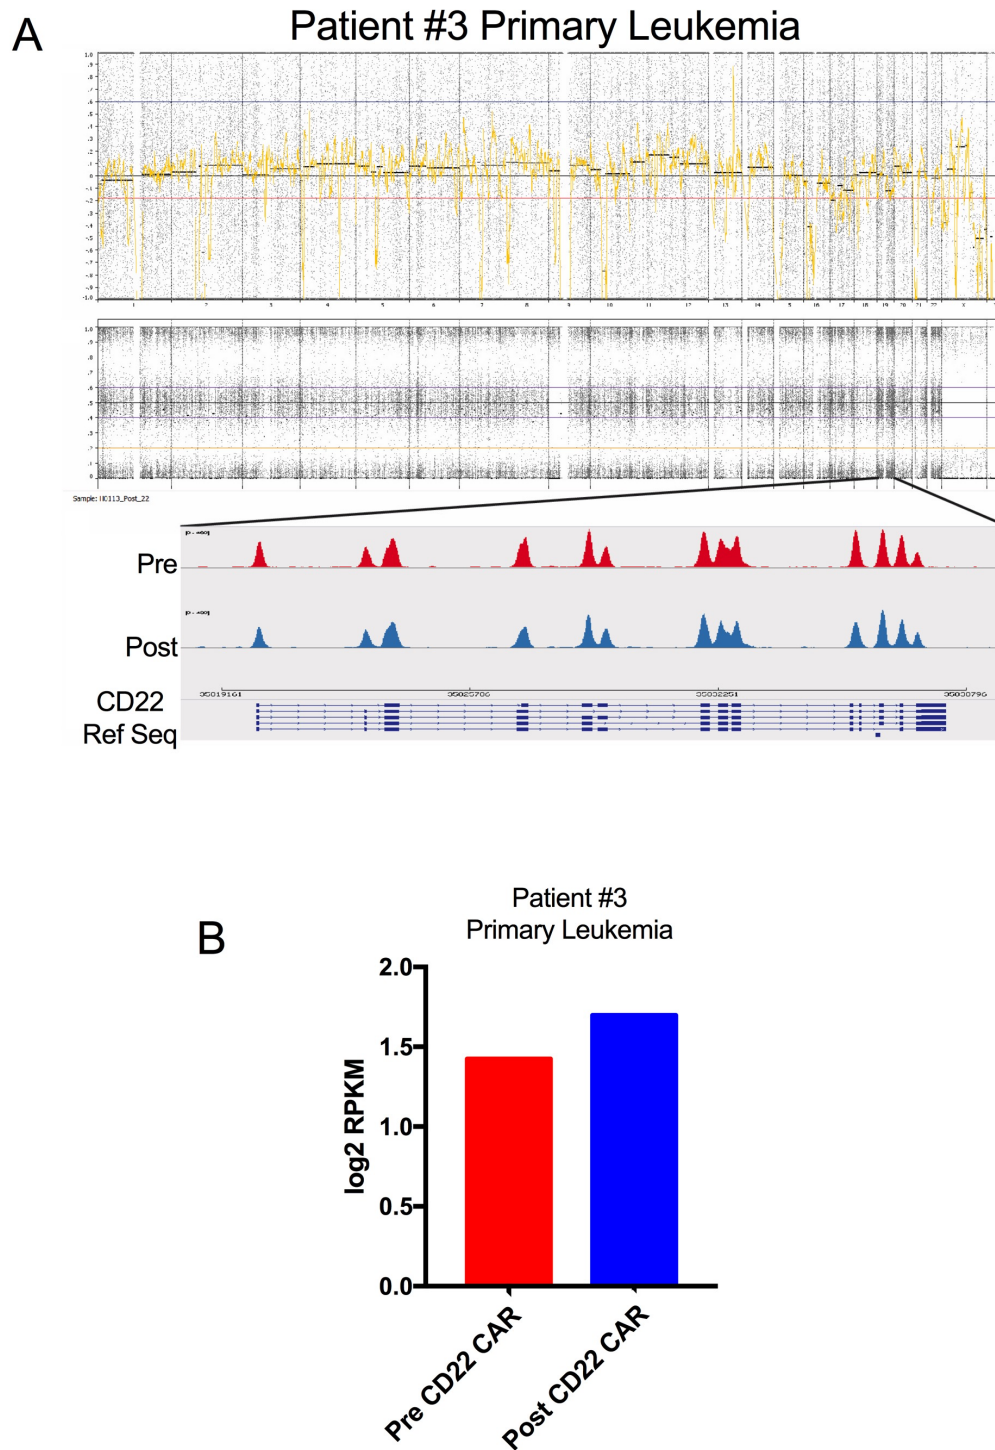

**Supplemental Figure 5. *In vitro* killing of CD19+/CD22+ ALL and single antigen expressing targets by CD19 CAR, CD22 CAR and a CD19xCD22 bispecific CAR.** Killing of parental Nalm6 (CD19+/CD22+) and Nalm6 with crispr/Cas9 mediated deletion of CD19 or CD22 (CD19Neg and CD22Neg) by CD19 CAR, CD22CAR and the bispecific CD19xCD22 CAR at various effector to target ratios. Killing is measured as loss of GFP positive tumor cells over time.

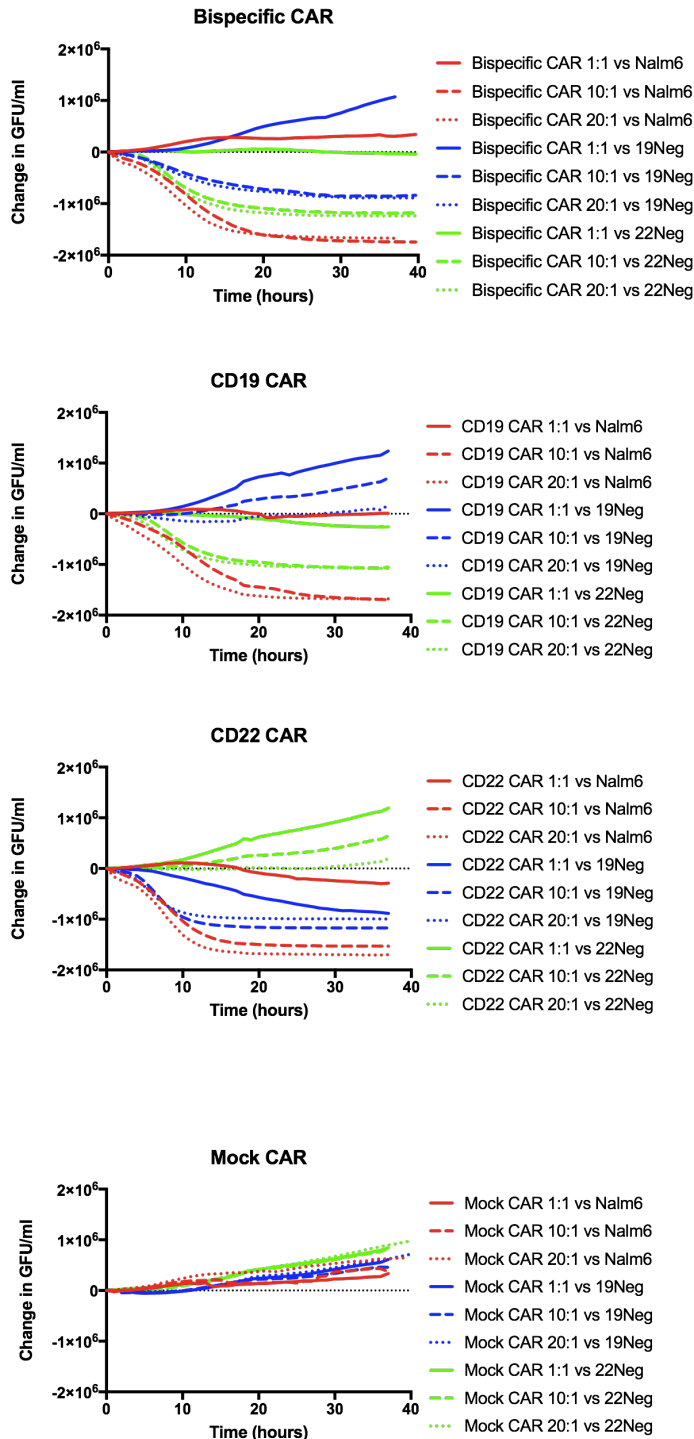

**Supplemental Figure 6. *Sequence of CD19xCD22 bispecific CAR.***

5'\_ctagcgccaccatgctgctgctcgtgacaagcctgctgctgtgagctgccccaccctgcctttctgctgatccccgacatccagatgaccagaccaccagcagcctgagcgccagcctggcgatagagtgaccatcagctgcagagccagccaggacatcagcaagtactgaaactggtatcagcagaaacccgacggcaccgtgaagctgctgatctaccacaccagcagactgcacagcggcgtgcccagcagatcttctggcagcggctccggcaccgactacagcctgaccatctccaacctggaacaggaagatatcgtacctacttctgtcagcaaggcaacaccctgcctacaccttcggcggaggcaccaagctggaaatcacaggcggcggaggatcccagggtgcagctgcagcagctgggaccggcctcgtgaagcctagccagaccctgtctctgacctgcgcatcagcggcgatagcgtgtccagcaatagcggcgctggaaactggatccggcagagcccttctagaggcctggaatggctgggcccggacactactaccgggtccaagtggtaaacgactacgcccgttccgtgaagtcccggatcacatcaacccgacaccagcaagaaccagttctcctgcagctgaacagcgtgacccccaggataaccgctgtactactgcgccagagaagtgaccggcgacctggaagatgccttcgacatctggggccagggcacaatggctaccgtgtctagcggcagcacaagcggctctggcaagcctggatctggcgagggctctaccaagggcgatattcagatgacacagagcccctccagcctgtccgcctctgtgggagacagagtgacaatcacctgtcgggcctcccagaccatctggtcttatctgaattggtatcagcagcggcctggcaaggcccccaacctgctgatctatgccgacagctctctgcagtcggcgtgccatctagattcagcggcagagcagcggcaccgattcacctgacaattagcagctctgcagggcaggacttcgccactactattgccagcagagctacagcatcccagaccttcggccagggaacaaaactggaatcaaagggggaggcggcagcgaagtgaaactgcaggaatctggccctggctggctggcccccaagccagtctctgagcgtgacctgtaccgtgtctggcgttcctgcccattacggcgtgtcctggatcagacagcccagaaaaggactggaatggctgggagtgatctggggcagcgagacaacctactacaacagcgcctgaagtccaggctgaccatcatcaaggacaactccaagagccaggtgttctgaagatgaattcctgcagaccgacgacaccgccatctattactgtccaagcactactactacggcggcagctacccatggactactggggacagggaaacctccgtgaccgtgtcctcttcggaaccacgacgccagcggcggaccaccaacaccggcggcccaccatcgcgtcgcagcccctgtccctgcgcccagaggcgtccggccagcggcggggggcgcagtgcacacgagggggctggacttcgctgtgatattacatctgggcgcccctggccgggactgtggggctcttctcctgtcactggttatcacctttactgcaaacggggcagaaagaaactcctgtatatattcaacaaccatttatgagaccagtacaactactcaagaggaagatggctgtagctgccatttccagaagaagaaggaggatgtgaactgagagtgaagttcagcaggagcgcagacccccgcgtacaagcagggccagaaccagctctataacgagctcaatctaggacgaagagaggagtacgatgtttggacaagagacgtggccgggaccctgagatggggggaaagccgagaaggaagaacctcaggaaggcctgtacaatgaactgcagaaagataagatggcggaggcctacagtgagattgggatgaaaggcagcgcgggaggggcaaggggcacgatggcctttaccagggtctcagtagccaccaaggacacactacgacgccttcacatgcaggcctgccccctcgttaagtc\_3'
